# Supplementary material for: Discovery of differentially expressed proteins for CAR-T therapy of ovarian cancers with a bioinformatics analysis
Source: publisher site journal article supplement (doi:10.18632/aging.206024), 2024-07-18
Supplement: Supplementary file [file aging-v16-206024-supplementary-material-SD1.pdf]

## SUPPLEMENTARY FIGURE

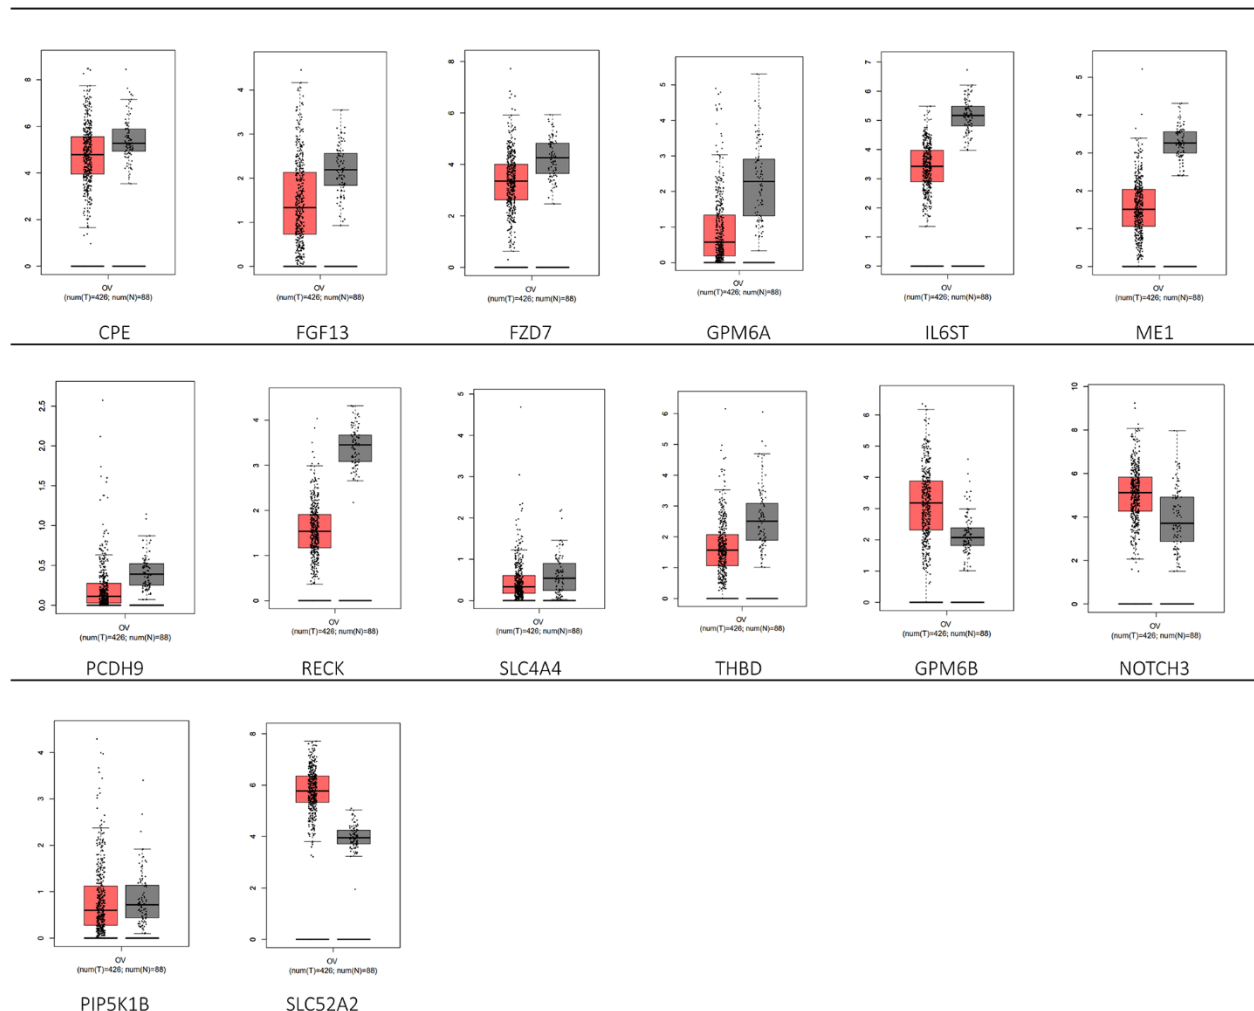

Supplementary Figure 1. Several PMG expressions are not significant based on the ovarian cancer dataset in the GEPIA database.
