# Supplementary material for: Discovery of differentially expressed proteins for CAR-T therapy of ovarian cancers with a bioinformatics analysis
Source: publisher site journal article supplement (doi:10.18632/aging.206024), 2024-07-18
Supplement: Supplementary file [file aging-v16i14-206024-supplementary-material-SD3.pdf]

## SUPPLEMENTARY TABLES

Supplementary Table 2. RT-PCR primer on EpCAM, MUC-1, and PRAME in ovarian cancer based on Kloudová et al., (2016) study.

| Name of marker (protein) | FOR primer (5'-3')          | REV primer (5'-3')           | Probe (5'-3')                      | No. of ovarian cancer samples examined | Positive result (%) |
|--------------------------|-----------------------------|------------------------------|------------------------------------|----------------------------------------|---------------------|
| EpCAM                    | GCAGGGTCTAA<br>AAGCTGGTGT   | ACCCATCTCCTTT<br>ATCTCAGCCTT | TGCTGTTATTGTGGT<br>TGTGGTGATAGCAGT | 41                                     | >90%                |
| MUC-1                    | CGTAGCCCCTA<br>TGAGAAGGTTTC | GCGACGTGCCC<br>CTACAAG       | AGCAGCCTCTCTTAC<br>ACAAACCCAGCA    | 41                                     | >90%                |
| PRAME                    | CGTTTGTGGGG<br>TTCCATTC     | CCAGAGGGAG<br>GCAGGTG        | TGGCTGTGTCTCCCG<br>TCAAAGGC        | 41                                     | >60%                |
